# Supplementary material for: Human milk enriched with human milk lyophilisate for feeding very low birth weight preterm infants: A preclinical experimental study focusing on fatty acid profile
Source: PLoS One. 2018 Sep 25;13(9):e0202794. doi: 10.1371/journal.pone.0202794 (PMC6155441; doi:10.1371/journal.pone.0202794)
Supplement: S4 File — (XLSX) [file pone.0202794.s004.xlsx]

## Sheet: Plan1
							CI95%
Variable	p-value		Variable	Comparisons	Difference (log)	p-value	LL	UL		Method: Due to the variability, the variables were considered as exponential logarithm (ln) in the analyzes. For the comparisons between the moments, linear models of mixed effects were adjusted through the PROC MIXED of the SAS 9.3 software. Orthogonal contrasts (multiple comparisons) were estimated only in cases where the null hypothesis (no difference between the means of the times) was reject…
C4:0	< 0,01			T1 - T2	-0.2726	0.1107	-0.6084	0.06318
C6:0	< 0,01			T1 - T3	0.2077	0.2233	-0.128	0.5435
C8:0	< 0,01		C4:0	T1 - T4	0.4544	0.013	0.09741	0.8115
C10:0	< 0,01			T2 - T3	0.4803	< 0,01	0.1445	0.8161
C11:0	< 0,01			T2 - T4	0.727	< 0,01	0.37	1.0841
C12:0	< 0,01			T3 - T4	0.2467	0.1741	-0.1103	0.6038
C13:0	0.09			T1 - T2	-0.4419	< 0,01	-0.6062	-0.2777
C14:0	< 0,01			T1 - T3	-0.4436	< 0,01	-0.6078	-0.2794
C14:1	< 0,01		C6:0	T1 - T4	-0.5334	< 0,01	-0.7086	-0.3581
C15:0	< 0,01			T2 - T3	-0.00167	0.984	-0.1659	0.1626
C15:1	< 0,01			T2 - T4	-0.09143	0.3041	-0.2667	0.08383
C16:0	< 0,01			T3 - T4	-0.08976	0.313	-0.265	0.0855
C16:1	0.06			T1 - T2	-0.4473	< 0,01	-0.6103	-0.2843
C17:0	< 0,01			T1 - T3	-0.4982	< 0,01	-0.6612	-0.3352
C17:1	0.38		C8:0	T1 - T4	-0.5513	< 0,01	-0.7252	-0.3773
C18:0	< 0,01			T2 - T3	-0.05092	0.5378	-0.2139	0.1121
C18:1n9c	0.43			T2 - T4	-0.1039	0.2395	-0.2779	0.07004
C18:2n6c	0.55			T3 - T4	-0.05302	0.5477	-0.227	0.121
C18:3n6	0.54			T1 - T2	-0.1765	< 0,01	-0.2639	-0.08919
C18:3n3	0.16			T1 - T3	-0.2198	< 0,01	-0.3072	-0.1325
C20:0	< 0,01		C10:0	T1 - T4	-0.2261	< 0,01	-0.3193	-0.1328
C20:1n9	0.37			T2 - T3	-0.04329	0.3288	-0.1306	0.04406
C20:2	0.87			T2 - T4	-0.04953	0.2954	-0.1428	0.0437
C20:3n6	0.01			T3 - T4	-0.00623	0.895	-0.09946	0.087
C21:0	0.43			T1 - T2	0.3394	< 0,01	0.1255	0.5533
C20:3n3	0.16			T1 - T3	0.5391	< 0,01	0.3252	0.753
C20:4n6	< 0,01		C11:0	T1 - T4	0.4441	< 0,01	0.218	0.6701
C20:5n3	0.03			T2 - T3	0.1997	0.0671	-0.01425	0.4136
C22:1n9	0.01			T2 - T4	0.1047	0.3615	-0.1214	0.3307
C22:2	0.07			T3 - T4	-0.09501	0.4073	-0.321	0.131
C24:0	0.15			T1 - T2	-0.1479	< 0,01	-0.2165	-0.07933
C24:1n9	< 0,01			T1 - T3	-0.1683	< 0,01	-0.2369	-0.09971
C22:6n3	< 0,01		C12:0	T1 - T4	-0.167	< 0,01	-0.2403	-0.09372
				T2 - T3	-0.02038	0.5577	-0.08897	0.04821
				T2 - T4	-0.01909	0.6074	-0.09237	0.0542
				T3 - T4	0.001295	0.9722	-0.07199	0.07458
				T1 - T2	-0.03794	0.1321	-0.08745	0.01158
				T1 - T3	-0.06612	< 0,01	-0.1156	-0.0166
			C14:0	T1 - T4	-0.08846	< 0,01	-0.1414	-0.0355
				T2 - T3	-0.02819	0.2623	-0.07771	0.02133
				T2 - T4	-0.05053	0.0613	-0.1035	0.002433
				T3 - T4	-0.02234	0.4057	-0.0753	0.03062
				T1 - T2	-0.03186	0.2935	-0.0916	0.02788
				T1 - T3	-0.08357	< 0,01	-0.1433	-0.02383
			C14:1	T1 - T4	-0.1426	< 0,01	-0.2065	-0.07872
				T2 - T3	-0.05171	0.0892	-0.1114	0.008033
				T2 - T4	-0.1108	< 0,01	-0.1747	-0.04686
				T3 - T4	-0.05905	0.0698	-0.1229	0.004848
				T1 - T2	0.08259	< 0,01	0.02559	0.1396
				T1 - T3	0.02097	0.4683	-0.03604	0.07797
			C15:0	T1 - T4	-0.0408	0.1878	-0.1017	0.02014
				T2 - T3	-0.06163	0.0343	-0.1186	-0.00462
				T2 - T4	-0.1234	< 0,01	-0.1843	-0.06245
				T3 - T4	-0.06177	0.04	-0.1227	-0.00082
				T1 - T2	0.1989	< 0,01	0.07651	0.3213
				T1 - T3	0.09627	0.1222	-0.02613	0.2187
			C15:1	T1 - T4	-0.01307	0.8434	-0.1437	0.1175
				T2 - T3	-0.1026	0.0996	-0.225	0.01975
				T2 - T4	-0.212	< 0,01	-0.3426	-0.08138
				T3 - T4	-0.1093	0.1001	-0.2399	0.02126
				T1 - T2	0.03619	< 0,01	0.01348	0.0589
				T1 - T3	0.03187	< 0,01	0.009163	0.05458
			C16:0	T1 - T4	0.009284	0.4506	-0.01498	0.03355
				T2 - T3	-0.00432	0.7073	-0.02703	0.01839
				T2 - T4	-0.02691	0.03	-0.05118	-0.00264
				T3 - T4	-0.02259	0.0678	-0.04685	0.001677
				T1 - T2	0.07011	< 0,01	0.01876	0.1215
				T1 - T3	0.06832	< 0,01	0.01697	0.1197
			C17:0	T1 - T4	0.007632	0.7835	-0.04719	0.06246
				T2 - T3	-0.00179	0.9452	-0.05314	0.04957
				T2 - T4	-0.06248	0.0258	-0.1173	-0.00765
				T3 - T4	-0.06069	0.0303	-0.1155	-0.00586
				T1 - T2	0.0636	< 0,01	0.02816	0.09904
				T1 - T3	0.07729	< 0,01	0.04185	0.1127
			C18:0	T1 - T4	0.05098	< 0,01	0.01309	0.08887
				T2 - T3	0.01369	0.4464	-0.02175	0.04912
				T2 - T4	-0.01262	0.5113	-0.05051	0.02527
				T3 - T4	-0.02631	0.172	-0.0642	0.01158
				T1 - T2	0.1365	< 0,01	0.05945	0.2136
				T1 - T3	0.1357	< 0,01	0.05865	0.2128
			C20:0	T1 - T4	0.1028	0.0147	0.02052	0.185
				T2 - T3	-0.0008	0.9837	-0.07789	0.07629
				T2 - T4	-0.03379	0.4179	-0.116	0.04844
				T3 - T4	-0.03299	0.429	-0.1152	0.04924
				T1 - T2	0.2722	< 0,01	0.0735	0.4709
				T1 - T3	0.2907	< 0,01	0.09203	0.4894
			C20:3n6	T1 - T4	0.2184	0.0421	0.007917	0.4289
				T2 - T3	0.01853	0.854	-0.1802	0.2172
				T2 - T4	-0.0538	0.6141	-0.2643	0.1567
				T3 - T4	-0.07232	0.498	-0.2828	0.1382
				T1 - T2	0.4226	< 0,01	0.1899	0.6553
				T1 - T3	0.6608	< 0,01	0.4281	0.8936
			C20:4n6	T1 - T4	0.4693	< 0,01	0.2225	0.7161
				T2 - T3	0.2382	0.0449	0.005502	0.4709
				T2 - T4	0.04668	0.709	-0.2001	0.2935
				T3 - T4	-0.1915	0.1272	-0.4384	0.05527
				T1 - T2	0.06383	0.1118	-0.01504	0.1427
				T1 - T3	0.1122	< 0,01	0.03329	0.191
			C20:5n3	T1 - T4	0.09204	0.0325	0.007772	0.1763
				T2 - T3	0.04833	0.2277	-0.03054	0.1272
				T2 - T4	0.02822	0.509	-0.05605	0.1125
				T3 - T4	-0.02011	0.6378	-0.1044	0.06416
				T1 - T2	0.1265	0.0396	0.006126	0.2469
				T1 - T3	0.1879	< 0,01	0.06752	0.3083
			C22:1n9	T1 - T4	0.1656	0.0118	0.03732	0.294
				T2 - T3	0.0614	0.315	-0.05898	0.1818
				T2 - T4	0.03914	0.5474	-0.08918	0.1675
				T3 - T4	-0.02226	0.7322	-0.1506	0.1061
				T1 - T2	-0.08524	0.0822	-0.1815	0.01102
				T1 - T3	-0.0828	0.0912	-0.1791	0.01346
			C24:1n9	T1 - T4	-0.1811	< 0,01	-0.2841	-0.07824
				T2 - T3	0.00244	0.9601	-0.09382	0.0987
				T2 - T4	-0.09591	0.0675	-0.1988	0.006997
				T3 - T4	-0.09835	0.0609	-0.2013	0.004556
				T1 - T2	0.4179	< 0,01	0.1841	0.6516
				T1 - T3	0.6343	< 0,01	0.4005	0.8681
			C22:6n3	T1 - T4	0.4515	< 0,01	0.2035	0.6994
				T2 - T3	0.2164	0.0693	-0.01734	0.4502
				T2 - T4	0.03359	0.7892	-0.2143	0.2815
				T3 - T4	-0.1828	0.1471	-0.4308	0.06509
